# Supplementary material for: Aquatic and terrestrial morphotypes of the aquatic invasive plant, Ludwigia grandiflora, show distinct morphological and metabolomic responses
Source: PubMed Central journal article supplement (PMC5838032; doi:10.1002/ece3.3848), 2018-02-04
Supplement: ECE3-8-2568-s001.pdf [file ECE3-8-2568-s001.pdf]

**Aquatic and terrestrial morphotypes of the aquatic invasive plant, *Ludwigia grandiflora* show distinct morphological and metabolomic responses.**

Kevin Billet<sup>1</sup>, Julien Genitoni<sup>1</sup>, Michel Bozec<sup>1</sup>, David Renault<sup>2,3</sup>, Dominique Barloy<sup>1\*</sup>

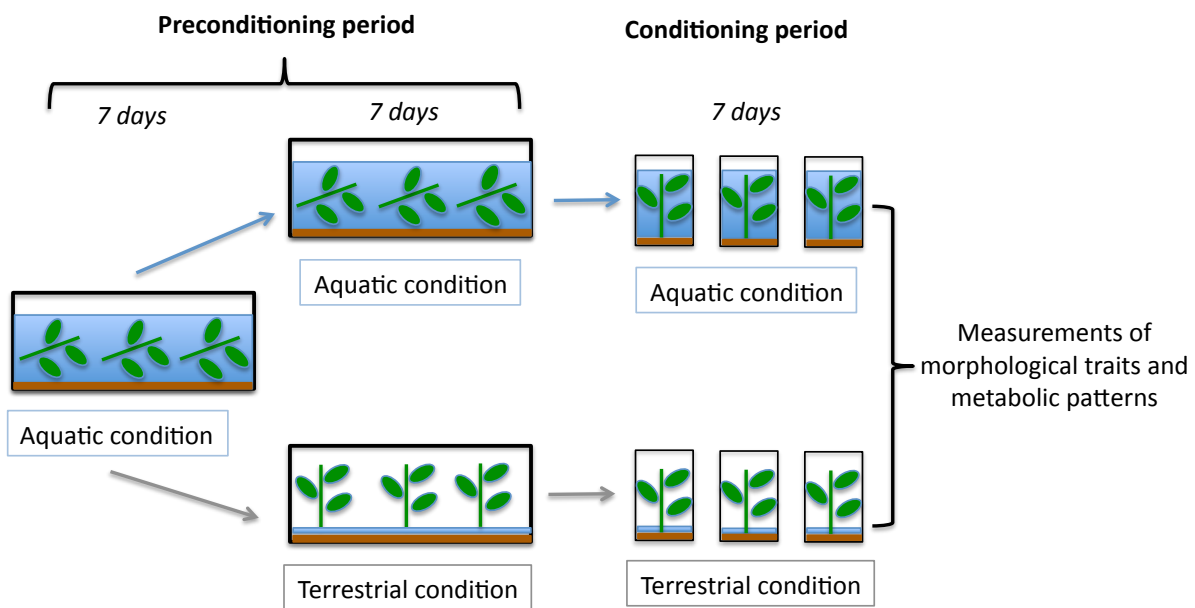

**Figure S1:** Experimental design of preconditioning and conditioning periods

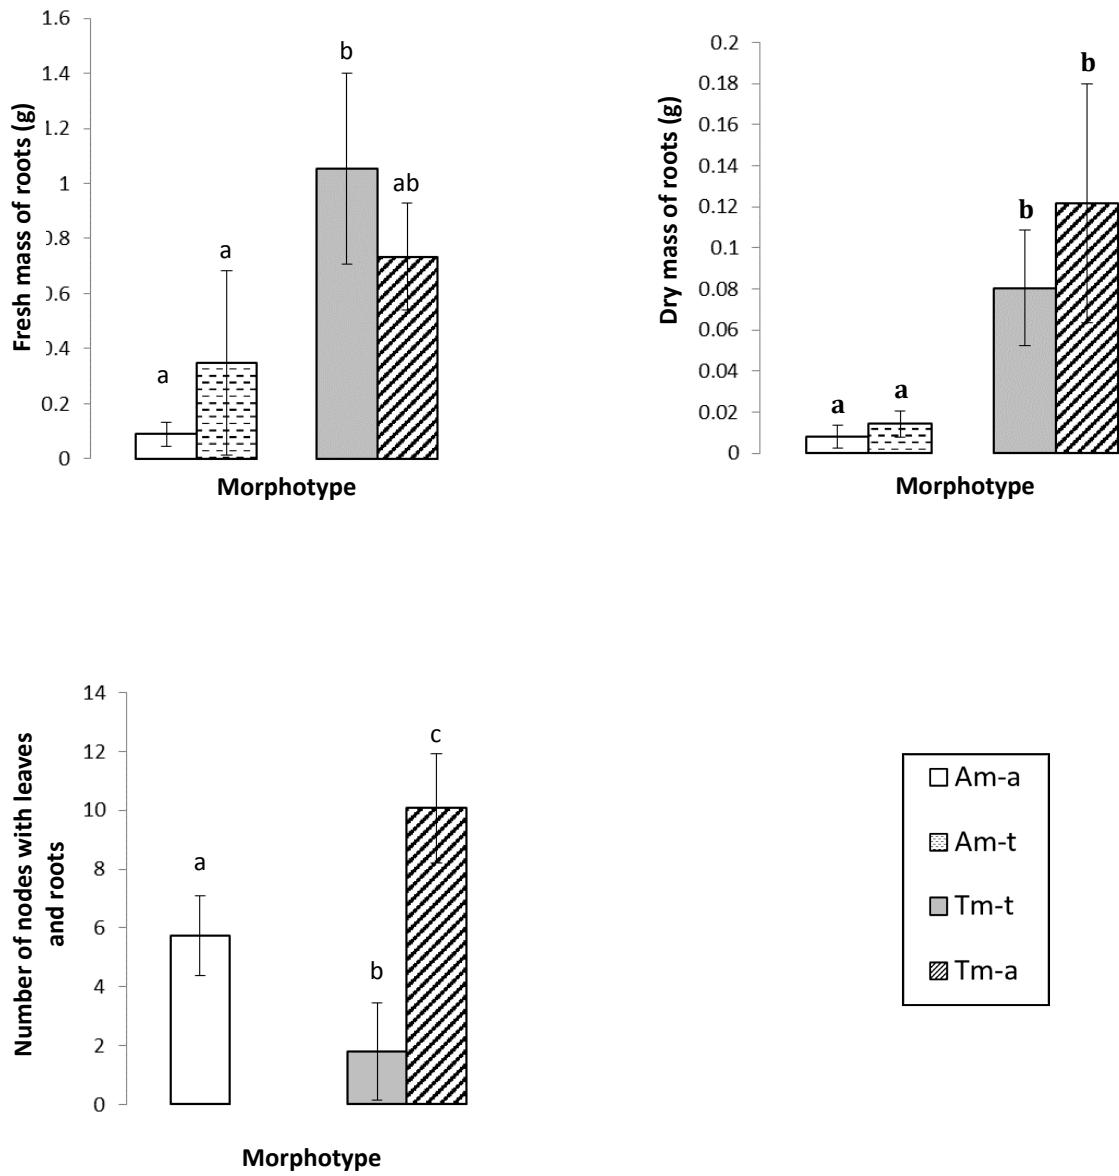

**Figure S2:** Variation of morphological traits of *L. grandiflora* in aquatic or terrestrial conditions

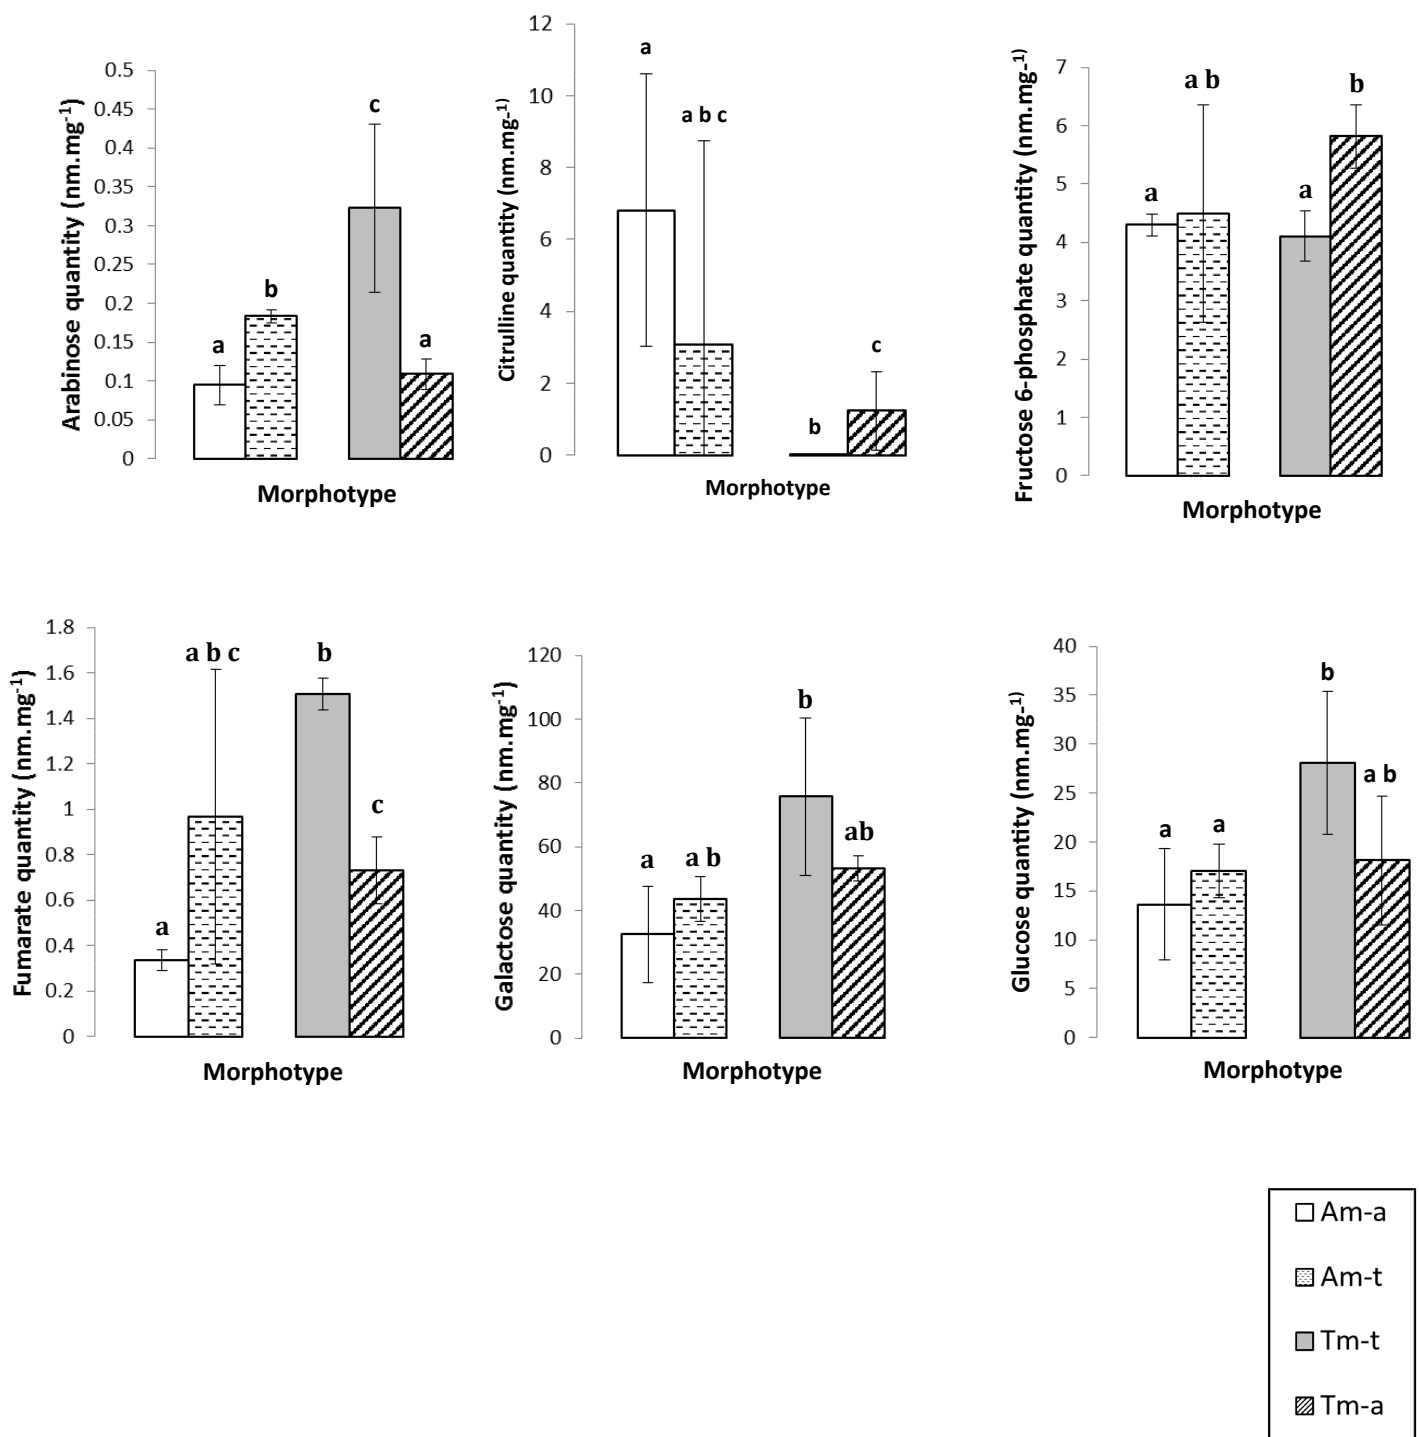

**Figure S3:** Changes in different metabolites involved in shoots *L. grandiflora* responses to aquatic or terrestrial conditions. Am-a and Am-t = aquatic morphotype in aquatic or terrestrial conditions; Tm-a and Tm-t = terrestrial morphotype in aquatic or terrestrial conditions, respectively. Same letter indicates non-different values ( $\alpha=0.05$ ).

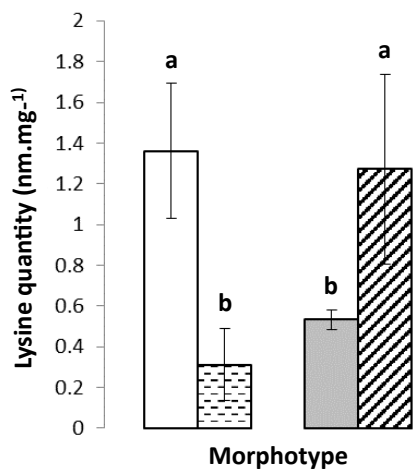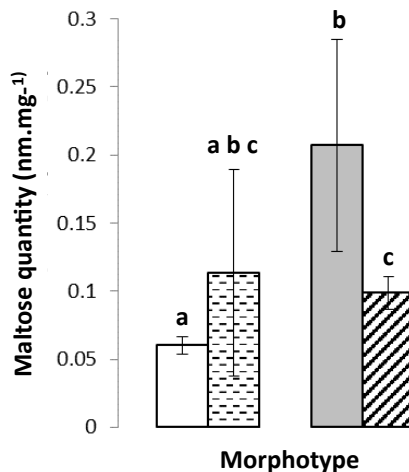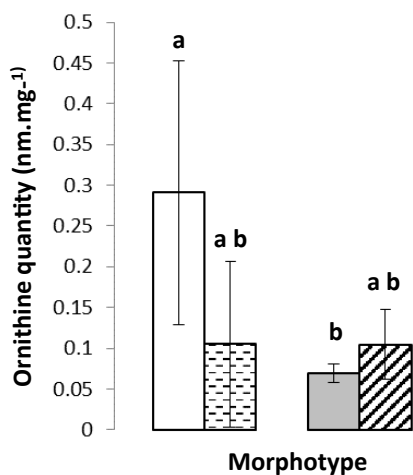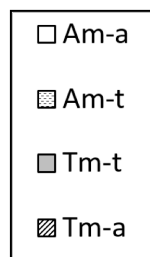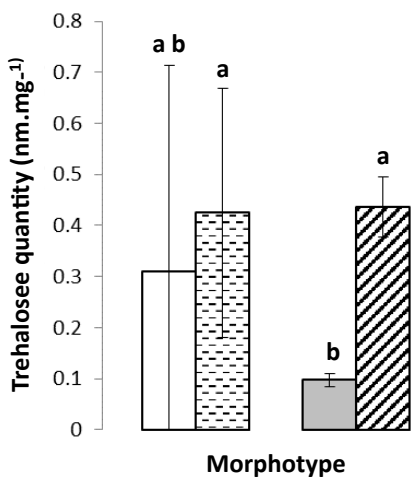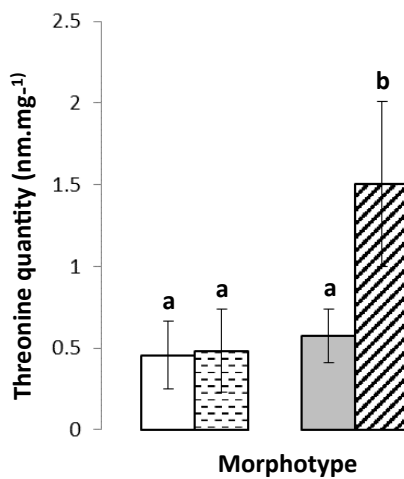

Figure S3: continued

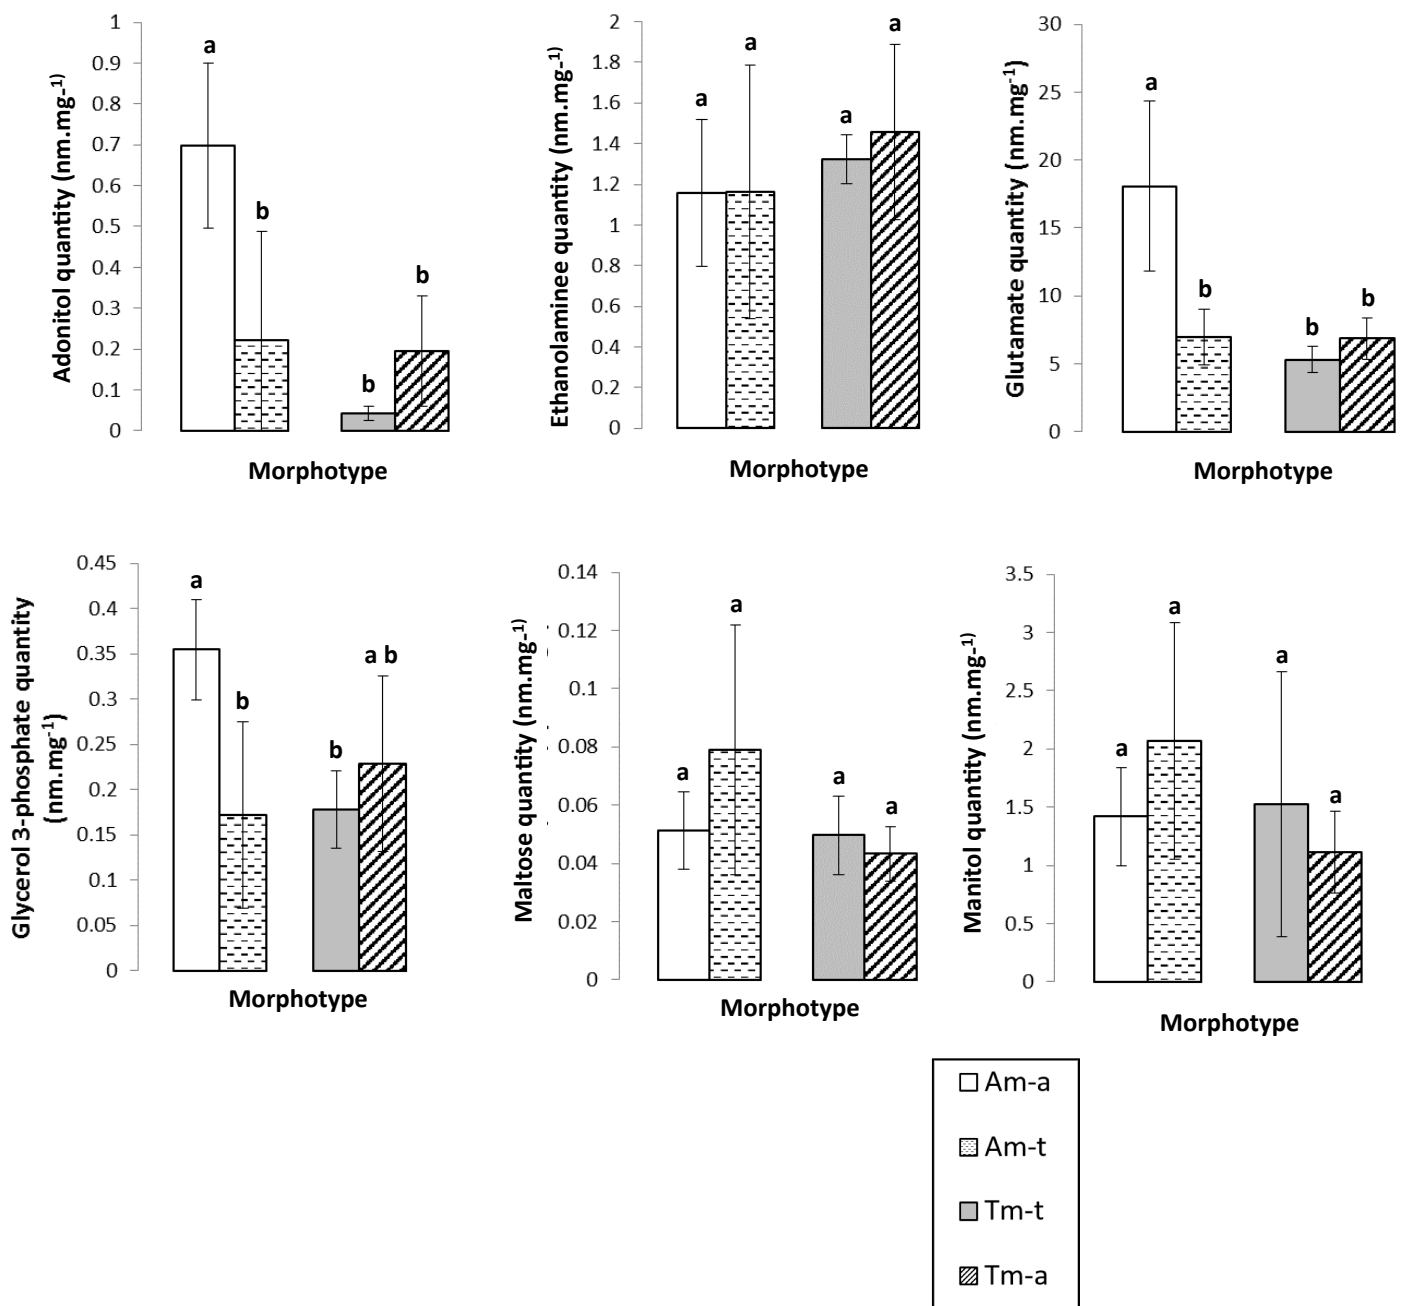

**Figure S4:** Changes in different metabolites involved in roots *L. grandiflora* responses to aquatic or terrestrial conditions. Am-a and Am-t = aquatic morphotype in aquatic or terrestrial conditions; Tm-a and Tm-t = terrestrial morphotype in aquatic or terrestrial conditions, respectively. Same letter indicates non-different values ( $\alpha=0.05$ ).

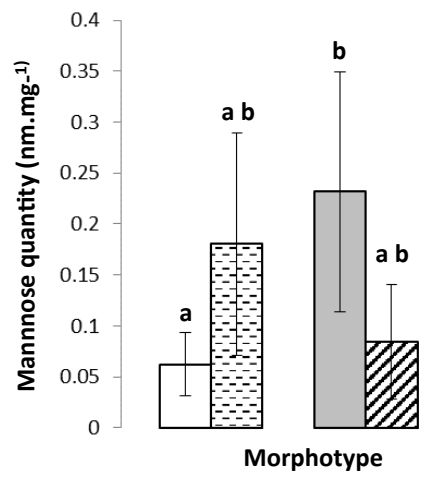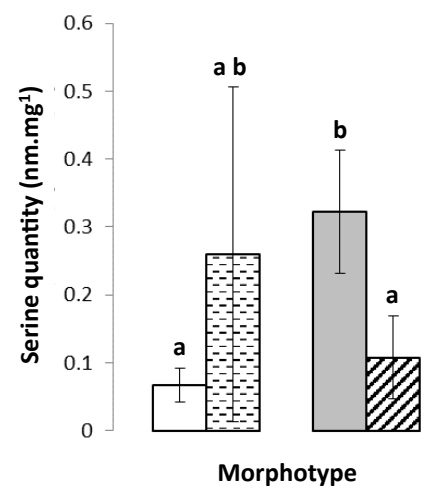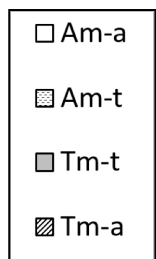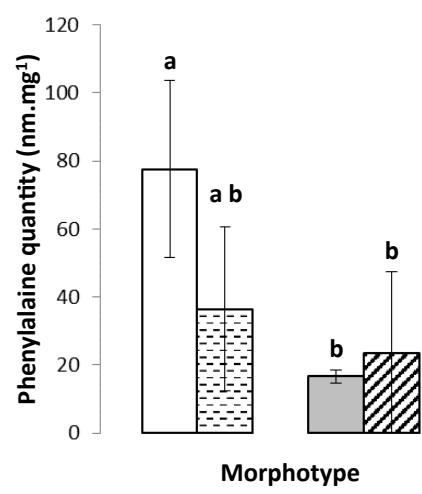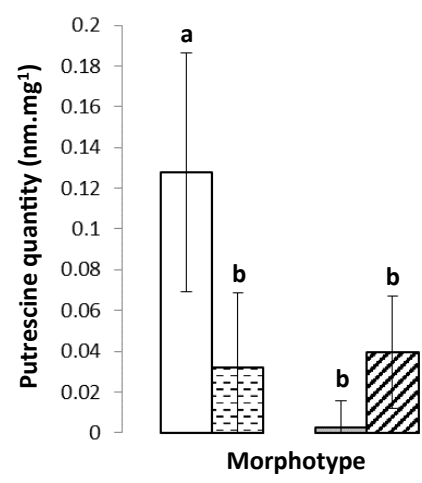

Figure S4 : continued

**Table S1: List of Log and Cos transformed data**

| <b>Morphological trait</b> | <b>Metabolites</b> |               |
|----------------------------|--------------------|---------------|
|                            | <b>Tige</b>        | <b>Racine</b> |
| LP                         | Alaline            | Clucose       |
| NbB                        | Aspartate          | Galactose     |
| FMS                        | F6P                | Glutamate     |
| DMS                        | Glycerate          | Glycerol 3P   |
| FMR                        | Isoleucine         | Mannitol      |
| DMR                        | Leucine            | Mannose       |
| Rr                         | Ornithrine         | Serine        |
| rr                         | Threonine          |               |
